# Supplementary material for: Simple and tunable surface coatings via polydopamine for modulating pharmacokinetics, cell uptake and biodistribution of polymeric nanoparticles
Source: Royal Society of Chemistry journal article supplement (doi:10.1039/c7ra01354j), 2017-01-01
Supplement: c7ra01354j1.pdf [file c7ra01354j1.pdf]

## Supporting Information

### Simple and tunable surface coatings via polydopamine for modulating pharmacokinetics, cell uptake and biodistribution of polymeric nanoparticles

Jingshuo Liu<sup>1</sup>, Hui Xu<sup>2</sup>, Xing Tang<sup>2</sup>, Jinghua Xu<sup>2</sup>, Zeng Jin<sup>3</sup>, Hui Li<sup>2</sup>, Shihan Wang<sup>1</sup>, Jingxin Gou<sup>2</sup> and Xiangqun Jin<sup>1\*</sup>

1. Department of Pharmaceutics, College of Pharmacy Sciences, Jilin University, Changchun 130021, Jilin, China

2. Department of Pharmaceutics, Shenyang Pharmaceutical University, Shenyang 110016, China

3. Department of Pharmacology, University of Alberta, Edmonton, AB, Canada

Table.S1 Surface element ratio of NPs with different coatings in XPS

| samples     | Surface component (%) |       |      |      |       |      |       |
|-------------|-----------------------|-------|------|------|-------|------|-------|
|             | C1s                   | O1s   | N1s  | S2p  | O/C   | N/C  | N/O   |
| PLGA        | 70.43                 | 29.57 | 0    | 0    | 41.98 | 0    | 0     |
| pD-PLGA     | 70.89                 | 28.41 | 0.71 | 0    | 40.08 | 1.00 | 2.50  |
| BSA-pD-PLGA | 73.76                 | 19.48 | 6.06 | 0.69 | 26.41 | 8.22 | 31.11 |
| PLL-pD-PLGA | 76.02                 | 22.61 | 1.37 | 0    | 29.75 | 1.80 | 6.05  |
| PEG-pD-PLGA | 70.17                 | 29.34 | 0.49 | 0    | 41.81 | 0.70 | 1.67  |

Note: O/C, is the ratio of O and C atoms; N/C, is the ratio of N and C atoms; N/O, is the ratio of N and O atoms;

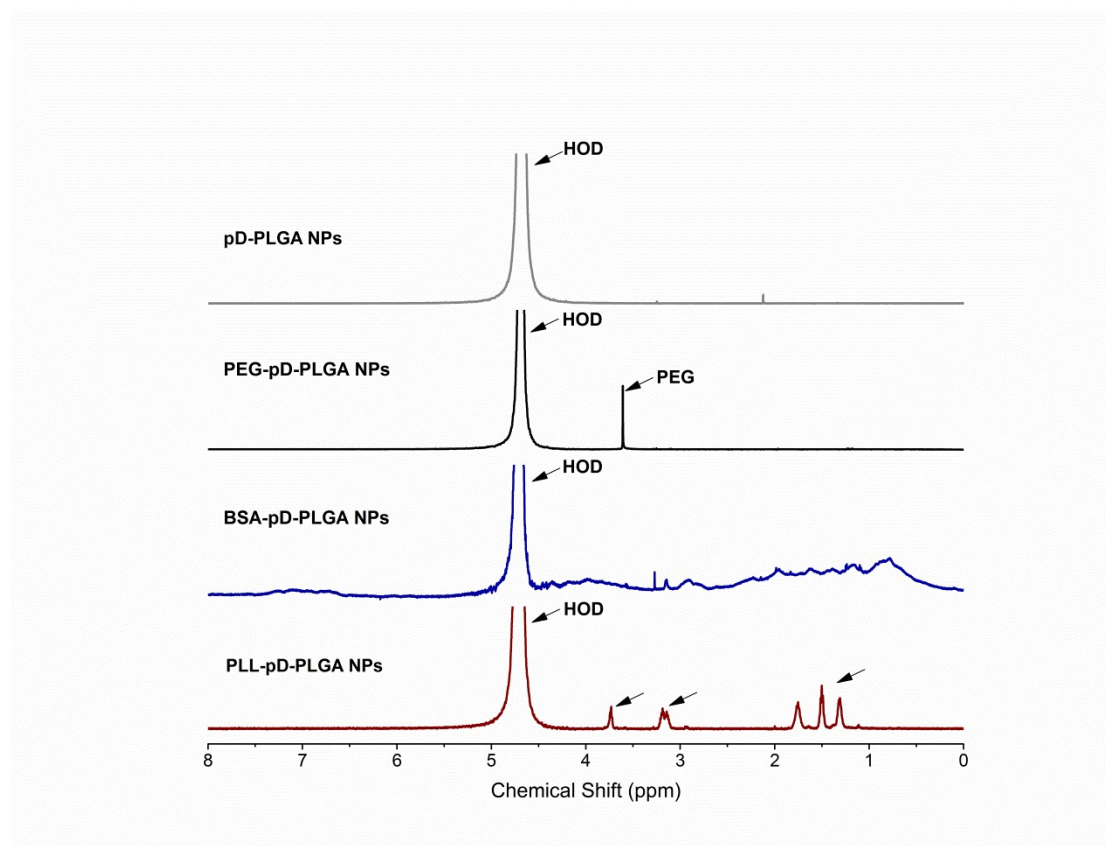

Figure.S1 <sup>1</sup>H-NMR spectra of blank nanoparticles in D<sub>2</sub>O

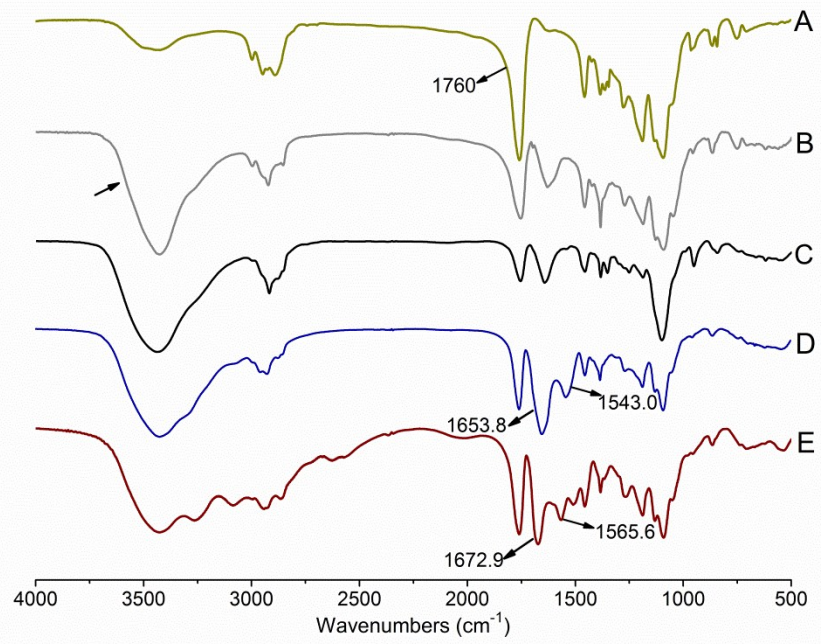

Figure.S2 FT-IR spectrum of (A) PLGA NPs,(B) pD-PLGA NPs,(C) PEG-pD-PLGA NPs,(D) BSA-pD-PLGA NPs and (E) PLL-pD-PLGA NPs.
